# Supplementary material
Source: Springer Nature journal article supplement (https://www.springermedizin.de/resource/supplementary/13098_2014_354_MOESM2_ESM.pdf/9671152)

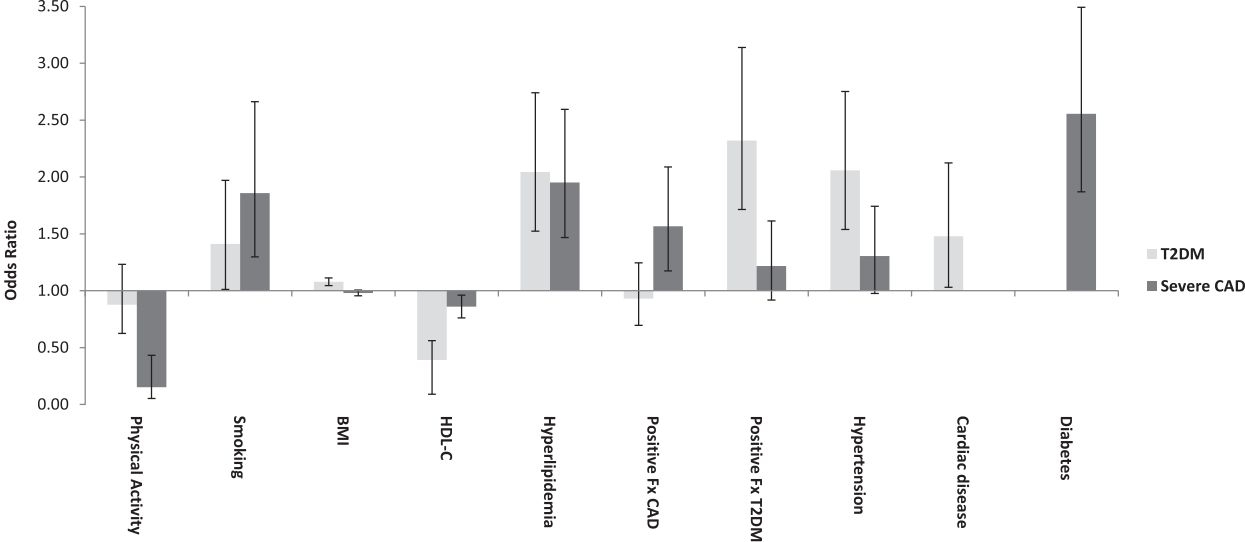

|                       |        |       |          |       |          |       |            |          |      |             |
|-----------------------|--------|-------|----------|-------|----------|-------|------------|----------|------|-------------|
| T2D<br><i>p</i> value | 0.4    | 0.04  | 0.000003 | 0.001 | 0.000002 | 0.6   | 0.00000005 | 0.000001 | 0.03 | NA          |
| CAD<br><i>p</i> value | 0.0004 | 0.001 | 0.1      | 0.008 | 0.000004 | 0.002 | 0.2        | 0.07     | NA   | 0.000000004 |

Supplement: MOESM2 [file 9671152]
